# Supplementary material
Source: Springer Nature journal article supplement (https://www.springermedizin.de/resource/supplementary/12889_2009_2354_MOESM1_ESM.pdf/9485508)
Supplement: MOESM1 [file 9485508]

**Control cohort  
(Cross-sectional)**

Pregnant women at first antenatal check-up:  
N\*=3675

Inclusion:  
Started September 1<sup>st</sup> 2000  
Stopped May 30<sup>th</sup> 2002

Questionnaire Q1  
n=1790

**Control cohort  
(Cross-sectional)**

Children 6 weeks postnatal:  
N\*=4900

Inclusion:  
Started September 1<sup>st</sup> 2000  
Stopped March 30<sup>th</sup> 2003

Questionnaire Q2  
n=3142

**Control cohort  
(Cross-sectional)**

Children 1 year postnatal:  
N\*=7000

Inclusion:  
Started September 1<sup>st</sup> 2000  
Stopped March 30<sup>th</sup> 2004

Questionnaire Q3  
n=3892

**Control cohort  
(Cross-sectional)**

Children 2 years postnatal:  
N\*=9100

Inclusion:  
Started September 1<sup>st</sup> 2000  
Stopped March 30<sup>th</sup> 2005

Questionnaire Q4  
n=4823

**Intervention cohort  
(Cross sectional follow-up)**

Pregnant women at first antenatal check-up:  
N\*=8400

Inclusion  
Started June 1<sup>st</sup> 2002  
Ended June 30<sup>th</sup> 2006

Questionnaire Q1  
n=2860

n=1685

Questionnaire Q2  
n=1685

n=1004

Questionnaire Q3  
n=1214

n=868

Questionnaire Q4  
n=1267

n=210

n=210

n=292

n=107
